# Supplementary material for: Amorphous colloidal photonic crystals assembled by mesoporous silica particles for thin layer chromatography with high separation efficiency and colorimetric recognition
Source: Royal Society of Chemistry journal article supplement (doi:10.1039/d0tc04644b), 2020-01-01
Supplement: d0tc04644b1.pdf [file d0tc04644b1.pdf]

Supporting Information

**Amorphous Colloidal Photonic Crystals Assembled by Mesoporous Silica Particles for Thin Layer Chromatography with High Separation Efficiency and Colorimetric Recognition**

*Xin Zhang, Yumei Ran, Qianqian Fu, and Jianping Ge\**

School of Chemistry and Molecular Engineering, Shanghai Key Laboratory of Green Chemistry and Chemical Processes, East China Normal University, Shanghai, China, 200062.  
E-mail: [jpge@chem.ecnu.edu.cn](mailto:jpge@chem.ecnu.edu.cn)

**Calculation of the volume fraction of micron-cracks/pores, interparticle voids, and mesopores in four photonic crystal plates**

According to the SEM images and BET measurements, there are three kinds of pores in the SiO<sub>2</sub> PC, SiO<sub>2</sub> APC, m-SiO<sub>2</sub> PC, and m-SiO<sub>2</sub> APC plates. These pores are 1) micron-scale cracks/pores in PC/APC film, 2) the interparticle voids with several tens of nanometers, and 3) the mesopores inside the particles. It should be noted that the micron-scale cracks and pores are produced by the shrinkage of PC and APC domains during solvent evaporation. The interparticle voids are produced due to the close packing of spherical particles.

Before the calculation of pore ratios, the area (A) of four PC/APC films were measured by a ruler, and the film thickness (d) were measured according to the cross-sectional SEM image so that the total volume (V<sub>total</sub>) was calculated to be their product. The mass of SiO<sub>2</sub> or m-SiO<sub>2</sub> particles (m<sub>SiO<sub>2</sub></sub>) was measured as the differential weight between the TLC plate and glass sides. The density of SiO<sub>2</sub> particles (ρ<sub>SiO<sub>2</sub></sub>) was considered as 2.04 g/cm<sup>3</sup> according to the bulk densities. The unit-mass mesopore volume of SiO<sub>2</sub> and m-SiO<sub>2</sub> (V<sub>BET</sub>) was measured to be 0 and 1.056 cm<sup>3</sup>/g, respectively, by the N<sub>2</sub> adsorption-desorption tests. Therefore, the density of m-SiO<sub>2</sub> particles (ρ<sub>m-SiO<sub>2</sub></sub>) was calculated to be 0.647 g/cm<sup>3</sup>, since 1 g of m-SiO<sub>2</sub> particles have the total volume of silica (1/2.04 cm<sup>3</sup>) and mesopores (1.056 cm<sup>3</sup>).

First of all, the volume of mesopores (V<sub>meso</sub>) could be calculated by the product of m<sub>SiO<sub>2</sub></sub> and V<sub>BET</sub>. Then, the volume fraction of mesopores (f<sub>meso</sub>) was calculated to be the ratio of V<sub>meso</sub> and

$V_{total}$ , as shown in Eq (1).

$$f_{meso} = \frac{V_{meso}}{V_{total}} = \frac{m_{SiO_2} \times V_{BET}}{A \times d} \quad (1)$$

Secondly, the volume of particles ( $V_{sphere}$ ) in these four PC/APC films could be calculated according to their mass and densities. In a colloidal photonic crystal, the volume fractions of particles and interparticle voids are 74% and 26% according to the close-packed fcc structure. While, in an amorphous colloidal crystal, the volume fractions of particles and interparticle voids are approximately 64% and 36%, according to the literature. Therefore, the volume of interparticle voids ( $V_{voids}$ ) actually could be calculated according to  $V_{sphere}$  and crystal structures. Eventually, the volume fraction of interparticle voids ( $f_{voids}$ ) was calculated to be the ratio of  $V_{voids}$  and  $V_{total}$ , as shown in Eq (2) for the  $SiO_2$  PC and the m- $SiO_2$  PC, and Eq (3) for the  $SiO_2$  APC and the m- $SiO_2$  APC.

$$f_{voids} = \frac{V_{voids}}{V_{total}} = \frac{m_{SiO_2}/\rho \div 0.74 \times 0.26}{A \times d} \quad (2)$$

$$f_{voids} = \frac{V_{voids}}{V_{total}} = \frac{m_{SiO_2}/\rho \div 0.64 \times 0.36}{A \times d} \quad (3)$$

Thirdly, the volume of the micron-scale cracks or pores ( $V_{micron}$ ) was the subtraction of  $V_{sphere}$  and  $V_{voids}$  from  $V_{total}$ . Then, the volume fraction of micron-scale cracks/pores ( $f_{micron}$ ) was calculated to be the ratio of  $V_{micron}$  and  $V_{total}$ , as shown in Eq (4) for the  $SiO_2$  PC and the m- $SiO_2$  PC, and Eq (5) for the  $SiO_2$  APC and the m- $SiO_2$  APC.

$$f_{micron} = \frac{V_{total} - V_{sphere} - V_{voids}}{V_{total}} = 1 - \frac{m_{SiO_2}/\rho \div 0.74}{A \times d} \quad (4)$$

$$f_{micron} = \frac{V_{total} - V_{sphere} - V_{voids}}{V_{total}} = 1 - \frac{m_{SiO_2}/\rho \div 0.64}{A \times d} \quad (5)$$

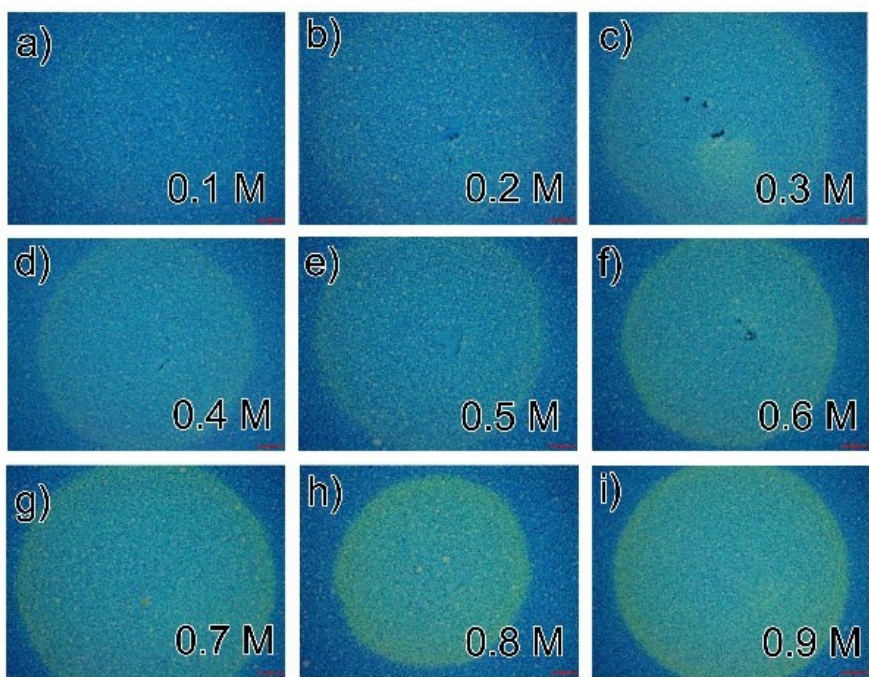

**Figure S1.** OM images of 4-NP sample spots with different loading concentration

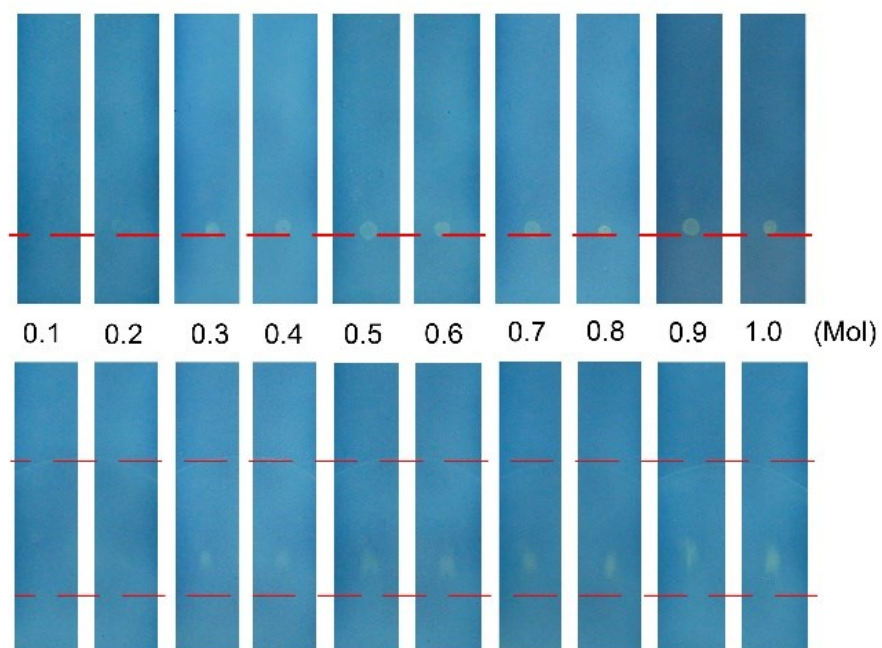

**Figure S2.** 4-NP sample spots with different loading concentration, developed by eluent

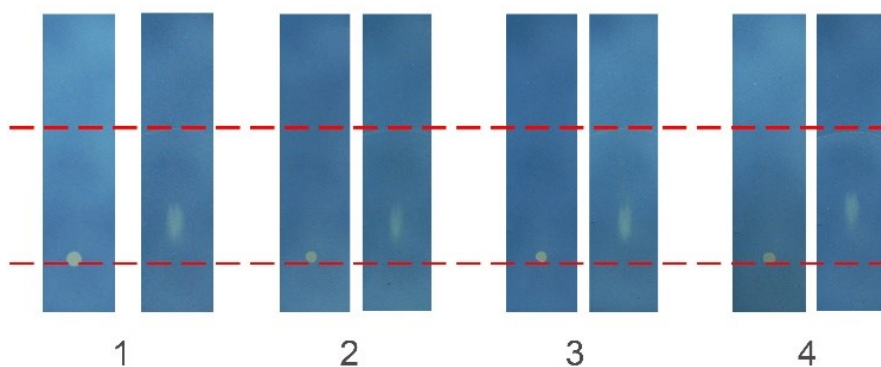

**Figure S3.** Development of 4-NP on the same APC plate for 4 times.

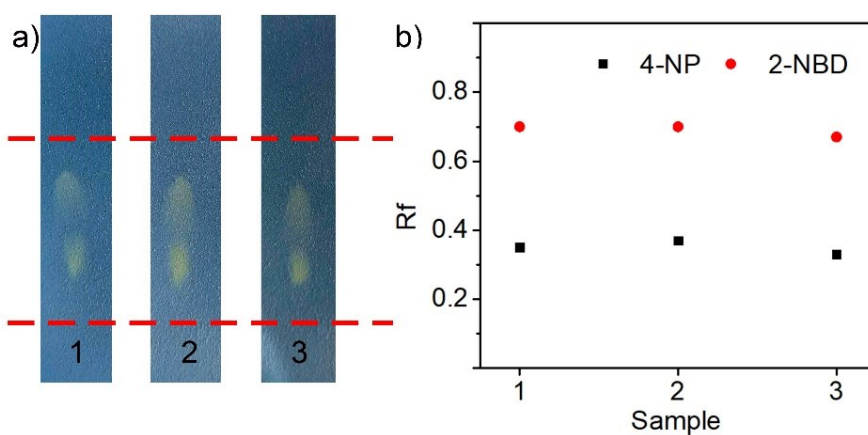

**Figure S4.** Three different APC-TLC plate used for the separation of 4-NP and 4-TBP

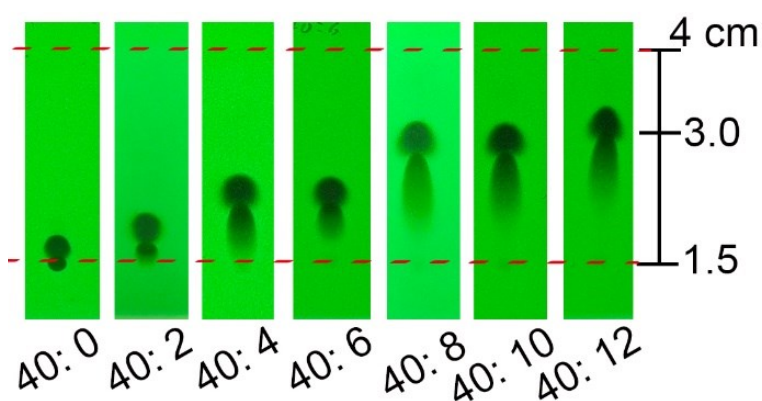

**Figure S5.** Digital photo of SiO<sub>2</sub> gel TLC plate for the separation of 4-NP, 2-NBD in different developing solvent

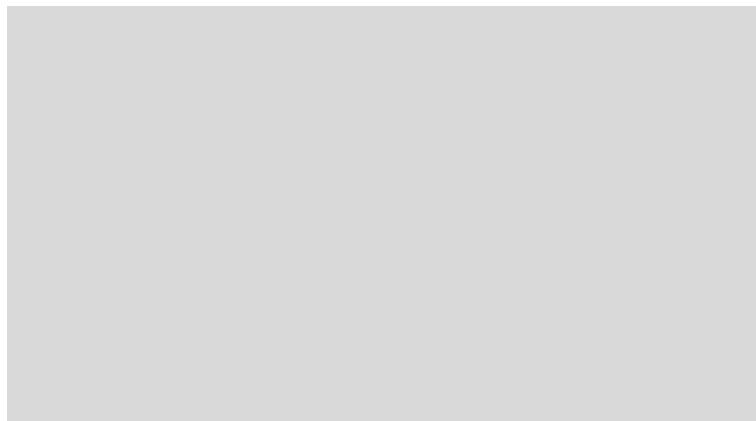

**Figure S6.** Digital photo of SiO<sub>2</sub> gel TLC plate for the separation of 2-NBD, 4-TBP in different developing solvent

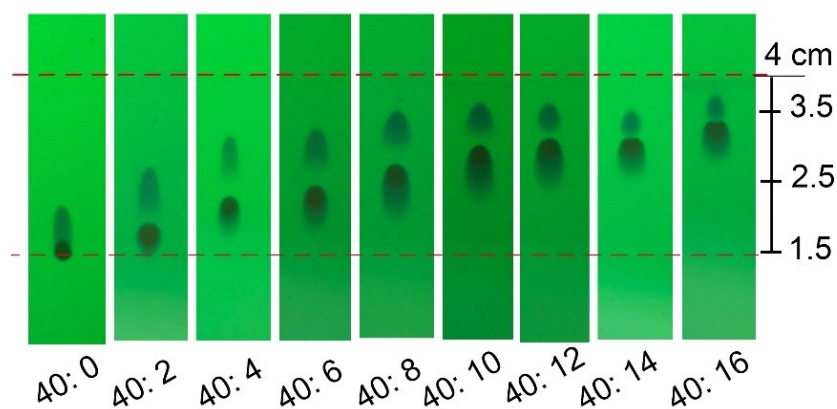

**Figure S7.** Digital photo of SiO<sub>2</sub> gel TLC plate for the separation of 4-NP, 4-TBP in different developing solvent

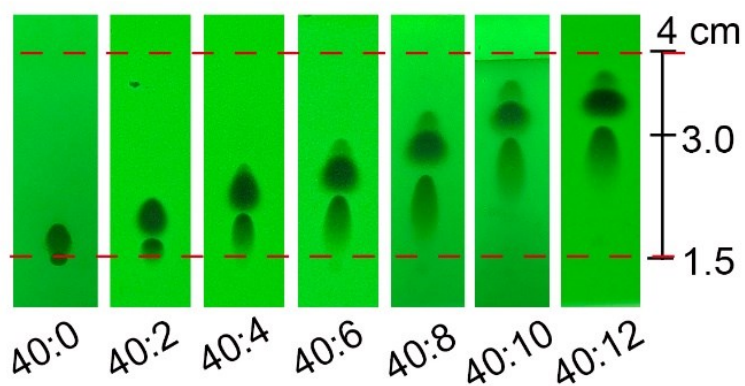

**Figure S8.** Digital photo of SiO<sub>2</sub> gel TLC plate for the separation of 4-NP, 2-NBD, 4-TBP in different developing solvent

**Table S1.1** Calculation of volume fraction of “mesopores” inside TLC plate

| TLC plate              | $m_{\text{SiO}_2}$<br>(mg) | $V_{\text{BET}}$<br>( $\text{cm}^3/\text{g}$ ) | $V_{\text{meso}}$<br>( $\text{mm}^3$ ) | A<br>( $\text{cm}^2$ ) | d<br>( $\mu\text{m}$ ) | $V_{\text{total}}$<br>( $\text{mm}^3$ ) | $f_{\text{meso}}$<br>(%) |
|------------------------|----------------------------|------------------------------------------------|----------------------------------------|------------------------|------------------------|-----------------------------------------|--------------------------|
| SiO <sub>2</sub> PC    | 8.30                       | 0                                              | 0                                      | 5.025                  | 11.43                  | 5.743                                   | 0.00                     |
| SiO <sub>2</sub> APC   | 40.0                       | 0                                              | 0                                      | 18.125                 | 22.19                  | 40.22                                   | 0.00                     |
| m-SiO <sub>2</sub> PC  | 2.83                       | 1.056                                          | 2.988                                  | 4.650                  | 13.66                  | 6.352                                   | 47.0                     |
| m-SiO <sub>2</sub> APC | 14.0                       | 1.056                                          | 14.78                                  | 18.125                 | 23.47                  | 42.54                                   | 34.8                     |

**Table S1.2** Calculation of volume fraction of “interparticle voids” inside TLC plate

| TLC plate              | $m_{\text{SiO}_2}$<br>(mg) | $\rho_{\text{sphere}}$<br>( $\text{g}/\text{cm}^3$ ) | $V_{\text{sphere}}$<br>( $\text{mm}^3$ ) | $V_{\text{voids}}$<br>( $\text{mm}^3$ ) | A<br>( $\text{cm}^2$ ) | d<br>( $\mu\text{m}$ ) | $V_{\text{total}}$<br>( $\text{mm}^3$ ) | $f_{\text{voids}}$<br>(%) |
|------------------------|----------------------------|------------------------------------------------------|------------------------------------------|-----------------------------------------|------------------------|------------------------|-----------------------------------------|---------------------------|
| SiO <sub>2</sub> PC    | 8.30                       | 2.040                                                | 4.069                                    | 1.430                                   | 5.025                  | 11.43                  | 5.743                                   | 24.9                      |
| SiO <sub>2</sub> APC   | 40.0                       | 2.040                                                | 19.61                                    | 11.03                                   | 18.125                 | 22.19                  | 40.22                                   | 27.4                      |
| m-SiO <sub>2</sub> PC  | 2.83                       | 0.647                                                | 4.374                                    | 1.537                                   | 4.650                  | 13.66                  | 6.352                                   | 24.2                      |
| m-SiO <sub>2</sub> APC | 14.0                       | 0.647                                                | 21.64                                    | 12.17                                   | 18.125                 | 23.47                  | 42.54                                   | 28.6                      |

**Table S1.3** Calculation of volume fraction of “micron-cracks/pores” inside TLC plate

| TLC plate              | $m_{\text{SiO}_2}$<br>(mg) | $\rho_{\text{sphere}}$<br>( $\text{g}/\text{cm}^3$ ) | $V_{\text{sphere}}$<br>( $\text{mm}^3$ ) | $V_{\text{micron}}$<br>( $\text{mm}^3$ ) | A<br>( $\text{cm}^2$ ) | d<br>( $\mu\text{m}$ ) | $V_{\text{total}}$<br>( $\text{mm}^3$ ) | $f_{\text{micron}}$<br>(%) |
|------------------------|----------------------------|------------------------------------------------------|------------------------------------------|------------------------------------------|------------------------|------------------------|-----------------------------------------|----------------------------|
| SiO <sub>2</sub> PC    | 8.30                       | 2.040                                                | 4.069                                    | 0.245                                    | 5.025                  | 11.43                  | 5.743                                   | 4.3                        |
| SiO <sub>2</sub> APC   | 40.0                       | 2.040                                                | 19.61                                    | 9.582                                    | 18.125                 | 22.19                  | 40.22                                   | 23.8                       |
| m-SiO <sub>2</sub> PC  | 2.83                       | 0.647                                                | 4.374                                    | 0.441                                    | 4.650                  | 13.66                  | 6.352                                   | 6.9                        |
| m-SiO <sub>2</sub> APC | 14.0                       | 0.647                                                | 21.64                                    | 8.729                                    | 18.125                 | 23.47                  | 42.54                                   | 20.5                       |

**Table S2.** TLC parameters for the separation of 4-NP and 2-NBD by traditional SiO<sub>2</sub> gel TLC (Entry 1-7) and m-SiO<sub>2</sub> APC-TLC (Entry 8).

| Entry | PE / EA | L <sub>4-NP</sub> /cm | W <sub>4-NP</sub> /cm | L <sub>2-NBD</sub> /cm | W <sub>2-NBD</sub> /cm | R    |
|-------|---------|-----------------------|-----------------------|------------------------|------------------------|------|
| 1     | 40 : 0  | 0.02                  | 0.05                  | 0.18                   | 0.25                   | 1.00 |
| 2     | 40 : 2  | 0.13                  | 0.25                  | 0.43                   | 0.35                   | 1.00 |
| 3     | 40 : 4  | 0.43                  | 0.55                  | 0.90                   | 0.40                   | 1.00 |
| 4     | 40 : 6  | 0.50                  | 0.40                  | 0.88                   | 0.35                   | 1.00 |
| 5     | 40 : 8  | 0.90                  | 0.80                  | 1.50                   | 0.40                   | 1.00 |
| 6     | 40 : 10 | 0.98                  | 0.65                  | 1.50                   | 0.40                   | 1.00 |
| 7     | 40 : 12 | 1.13                  | 0.75                  | 1.70                   | 0.40                   | 1.00 |
| 8     | 40 : 1  | 0.88                  | 0.35                  | 1.55                   | 0.3                    | 2.08 |

**Table S3.** TLC parameters for the separation of 2-NBD and 4-TBP by traditional SiO<sub>2</sub> gel TLC (Entry 1-7) and m-SiO<sub>2</sub> APC-TLC (Entry 8).

| Entry | PE / EA | L <sub>2-NBD</sub> /cm | W <sub>2-NBD</sub> /cm | L <sub>4-TBP</sub> /cm | W <sub>4-TBP</sub> /cm | R    |
|-------|---------|------------------------|------------------------|------------------------|------------------------|------|
| 1     | 40 : 0  | 0.15                   | 0.30                   | 0.15                   | 0.30                   | 0.00 |
| 2     | 40 : 2  | 0.63                   | 0.45                   | 0.63                   | 0.45                   | 0.00 |
| 3     | 40 : 4  | 0.70                   | 0.40                   | 1.00                   | 0.20                   | 1.00 |
| 4     | 40 : 6  | 1.23                   | 0.55                   | 1.63                   | 0.25                   | 1.00 |
| 5     | 40 : 8  | 1.43                   | 0.55                   | 1.83                   | 0.25                   | 1.00 |
| 6     | 40 : 10 | 1.53                   | 0.45                   | 1.88                   | 0.25                   | 1.00 |
| 7     | 40 : 12 | 1.63                   | 0.45                   | 2.00                   | 0.30                   | 1.00 |
| 8     | 40 : 1  | 1.40                   | 0.40                   | 2.10                   | 0.40                   | 1.75 |

**Table S4.** TLC parameters for the separation of 4-NP and 4-TBP by traditional SiO<sub>2</sub> gel TLC (Entry 1-9) and m-SiO<sub>2</sub> APC-TLC (Entry 10).

| Entry | PE / EA | L <sub>4-NP</sub> /cm | W <sub>4-NP</sub> /cm | L <sub>4-TBP</sub> /cm | W <sub>4-TBP</sub> /cm | R    |
|-------|---------|-----------------------|-----------------------|------------------------|------------------------|------|
| 1     | 40 : 0  | 0.08                  | 0.15                  | 0.39                   | 0.47                   | 1.00 |
| 2     | 40 : 2  | 0.20                  | 0.40                  | 0.91                   | 0.58                   | 1.45 |
| 3     | 40 : 4  | 0.50                  | 0.60                  | 1.35                   | 0.60                   | 1.42 |
| 4     | 40 : 6  | 0.63                  | 0.65                  | 1.53                   | 0.55                   | 1.50 |
| 5     | 40 : 8  | 0.83                  | 0.85                  | 1.76                   | 0.52                   | 1.36 |
| 6     | 40 : 10 | 1.13                  | 0.85                  | 1.93                   | 0.45                   | 1.23 |
| 7     | 40 : 12 | 1.29                  | 0.62                  | 1.93                   | 0.45                   | 1.19 |
| 8     | 40 : 14 | 1.36                  | 0.52                  | 1.88                   | 0.35                   | 1.18 |
| 9     | 40 : 16 | 1.60                  | 0.60                  | 2.10                   | 0.40                   | 1.00 |
| 10    | 40 : 1  | 0.65                  | 0.5                   | 1.55                   | 0.30                   | 2.25 |

**Table S5.** TLC parameters for the separation of 4-NP, 2-NBD and 4-TBP by traditional SiO<sub>2</sub> gel TLC (Entry 1-7) and m-SiO<sub>2</sub> APC-TLC (Entry 8).

| Entry | PE / EA | L <sub>4-NP</sub> /cm | W <sub>4-NP</sub> /cm | L <sub>2-NBD</sub> /cm | W <sub>2-NBD</sub> /cm | L <sub>4-TBP</sub> /cm | W <sub>4-TBP</sub> /cm | R <sub>NP-NBD</sub> | R <sub>NBD-TBP</sub> |
|-------|---------|-----------------------|-----------------------|------------------------|------------------------|------------------------|------------------------|---------------------|----------------------|
| 1     | 40 : 0  | 0.02                  | 0.05                  | 0.23                   | 0.35                   | 0.23                   | 0.35                   | 1.00                | 0.00                 |
| 2     | 40 : 2  | 0.13                  | 0.25                  | 0.50                   | 0.40                   | 0.50                   | 0.40                   | 1.15                | 0.00                 |
| 3     | 40 : 4  | 0.33                  | 0.45                  | 0.80                   | 0.40                   | 1.05                   | 0.10                   | 1.12                | 1.00                 |
| 4     | 40 : 6  | 0.48                  | 0.55                  | 1.03                   | 0.35                   | 1.30                   | 0.20                   | 1.22                | 1.00                 |
| 5     | 40 : 8  | 0.66                  | 0.68                  | 1.33                   | 0.35                   | 1.63                   | 0.25                   | 1.29                | 1.00                 |
| 6     | 40 : 10 | 1.10                  | 0.70                  | 1.75                   | 0.30                   | 2.00                   | 0.20                   | 1.30                | 1.00                 |
| 7     | 40 : 12 | 1.30                  | 0.60                  | 1.85                   | 0.30                   | 2.13                   | 0.25                   | 1.22                | 1.00                 |
| 8     | 40 : 1  | 0.85                  | 0.30                  | 1.53                   | 0.35                   | 2.10                   | 0.40                   | 2.08                | 1.53                 |
